# Supplementary material for: AMPK-PDZD8-GLS1 axis mediates calorie restriction-induced lifespan extension
Source: Cell Res. 2024 Sep 19;34(11):806–9. doi: 10.1038/s41422-024-01021-3 (PMC11528062; doi:10.1038/s41422-024-01021-3)

### Full scans.

Blots, as shown in this figure, were cut into slices before incubation with primary antibodies. The Pierce™ Prestained Protein MW Marker, Cat. 26612, from ThermoFisher Scientific, was used as the protein marker.

#### Fig. 1a (left)

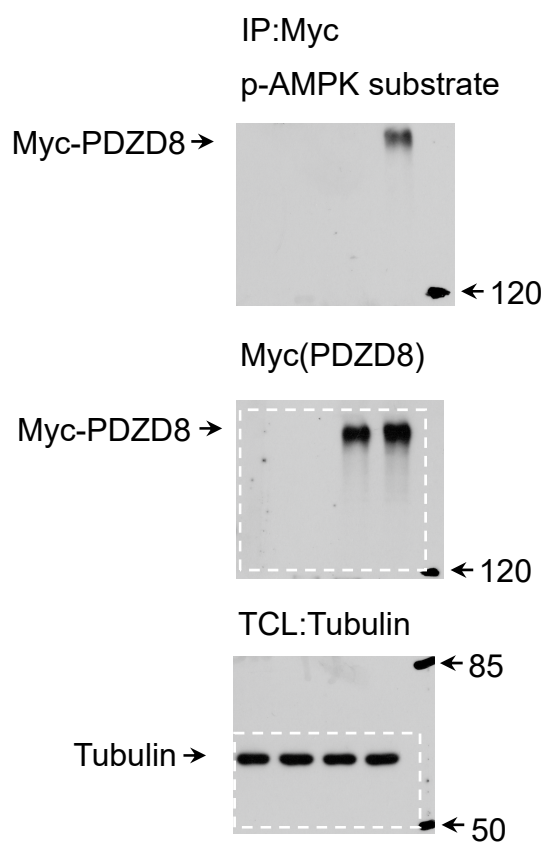

HEK293T

#### Fig. 1a (right)

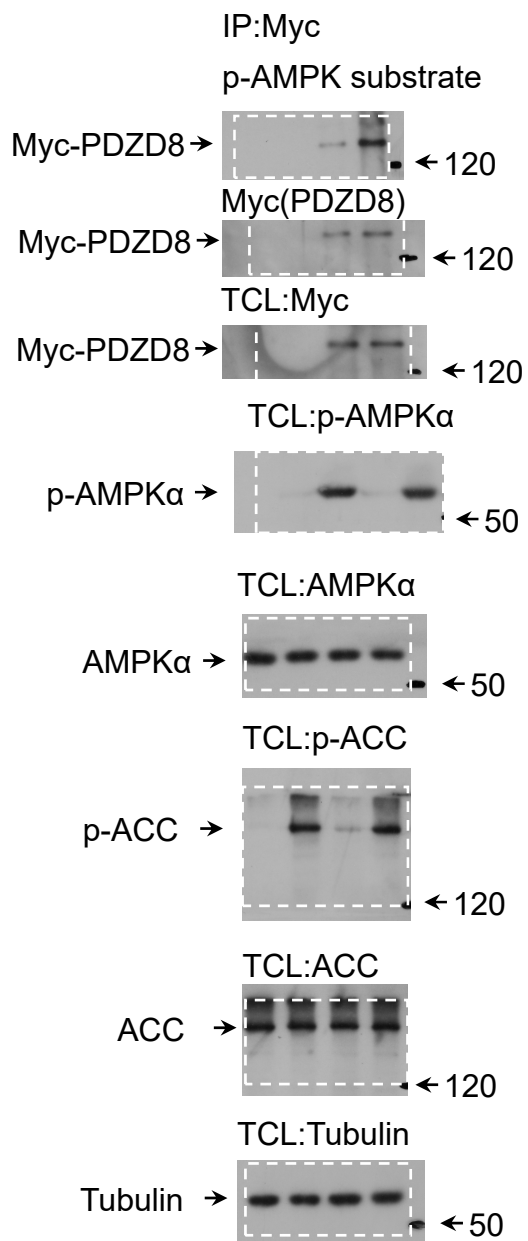

HEK293T

**Fig. S1b**

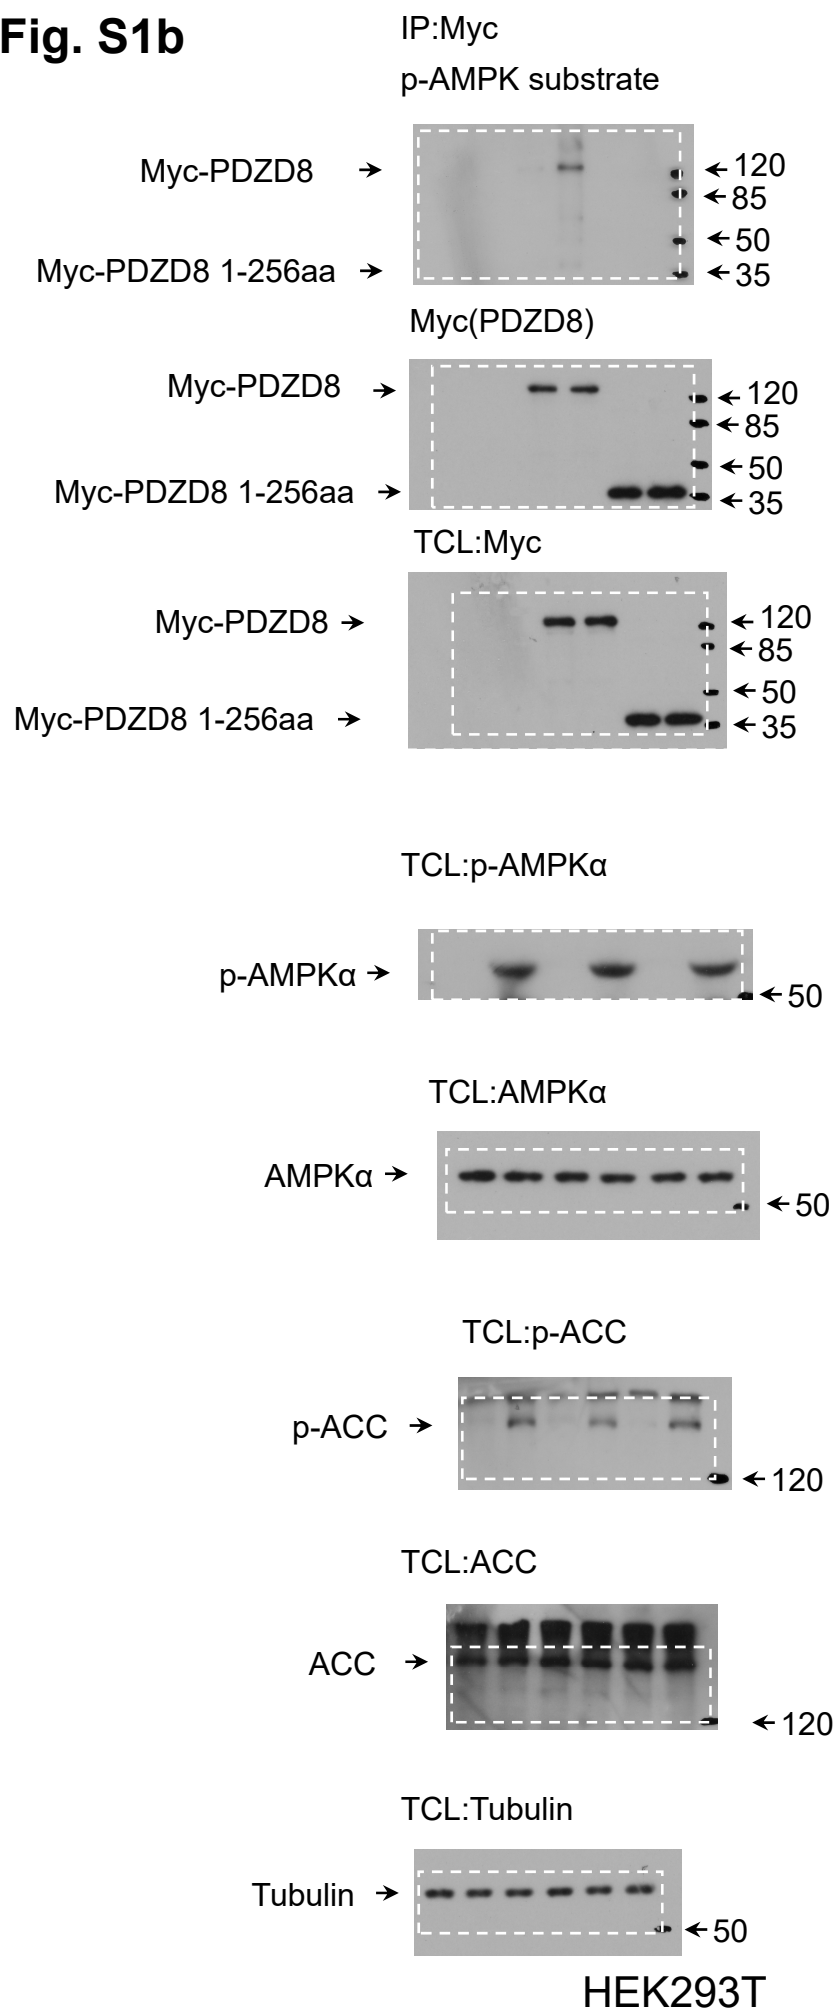

**Fig. S1b**

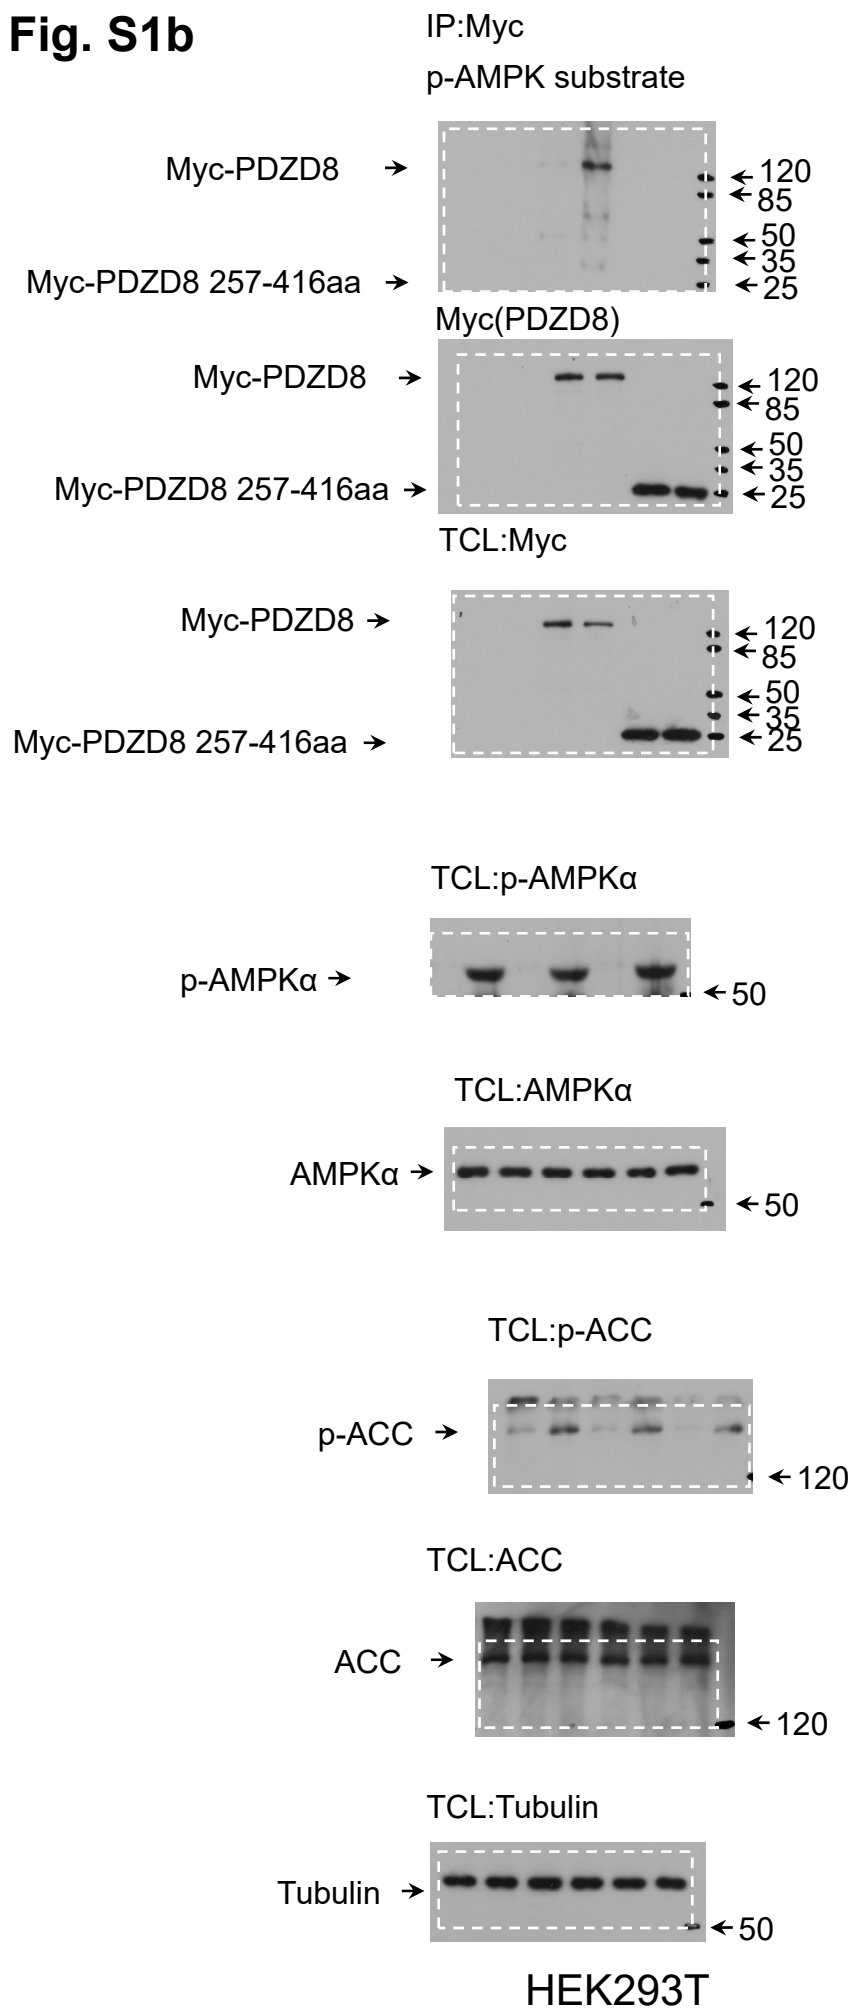

**Fig. S1b**

IP:Myc  
p-AMPK substrate

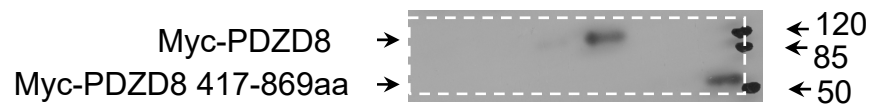

Myc(PDZD8)

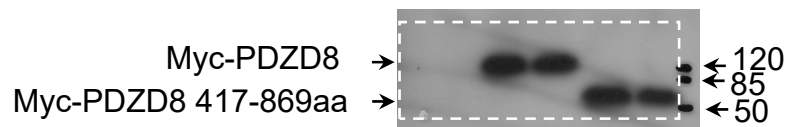

TCL:Myc

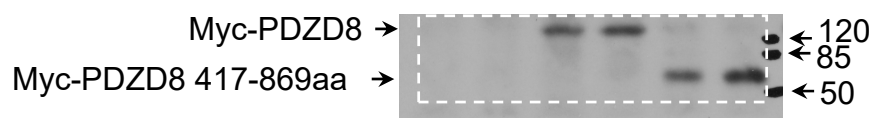

TCL:p-AMPK $\alpha$

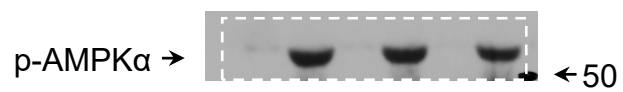

TCL:AMPK $\alpha$

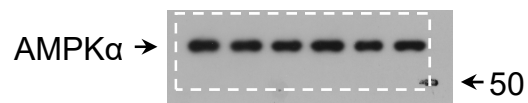

TCL:p-ACC

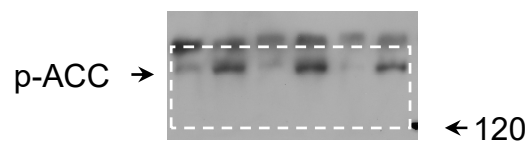

TCL:ACC

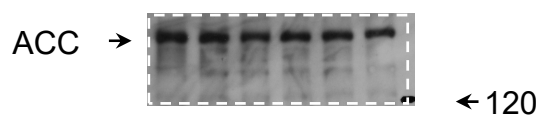

TCL:Tubulin

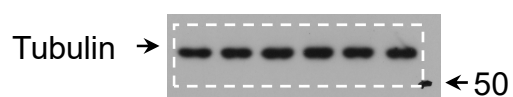

HEK293T

**Fig. S1b**

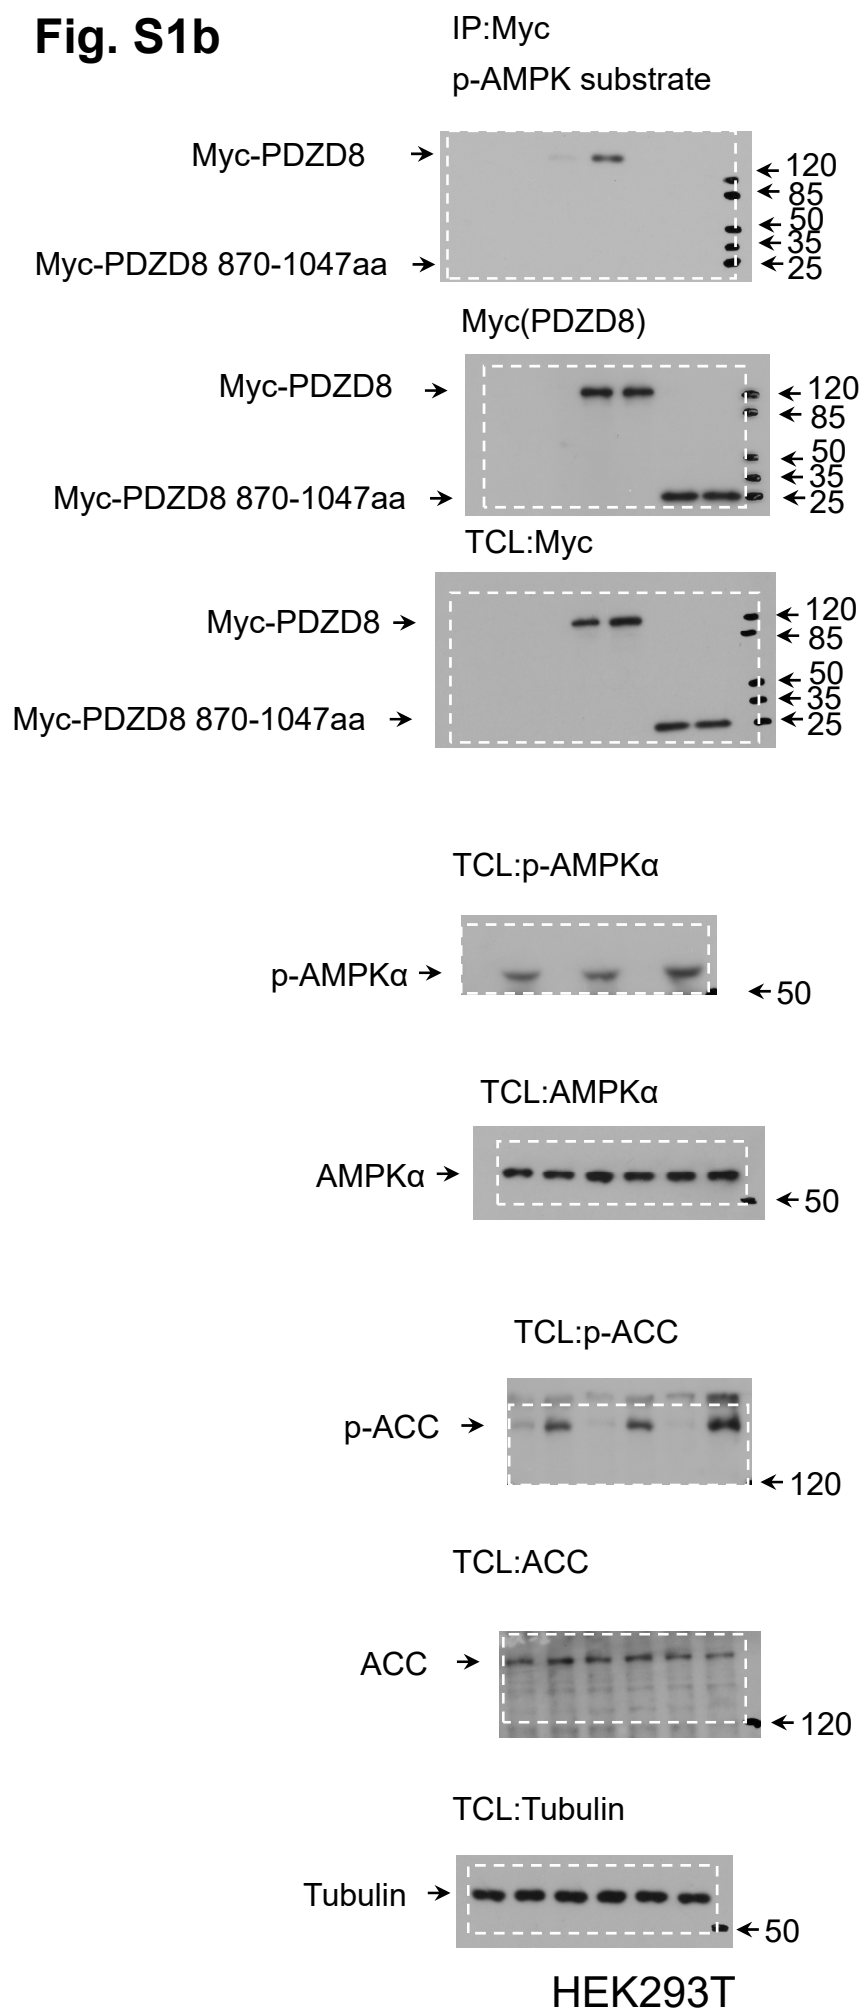

**Fig. S1b**

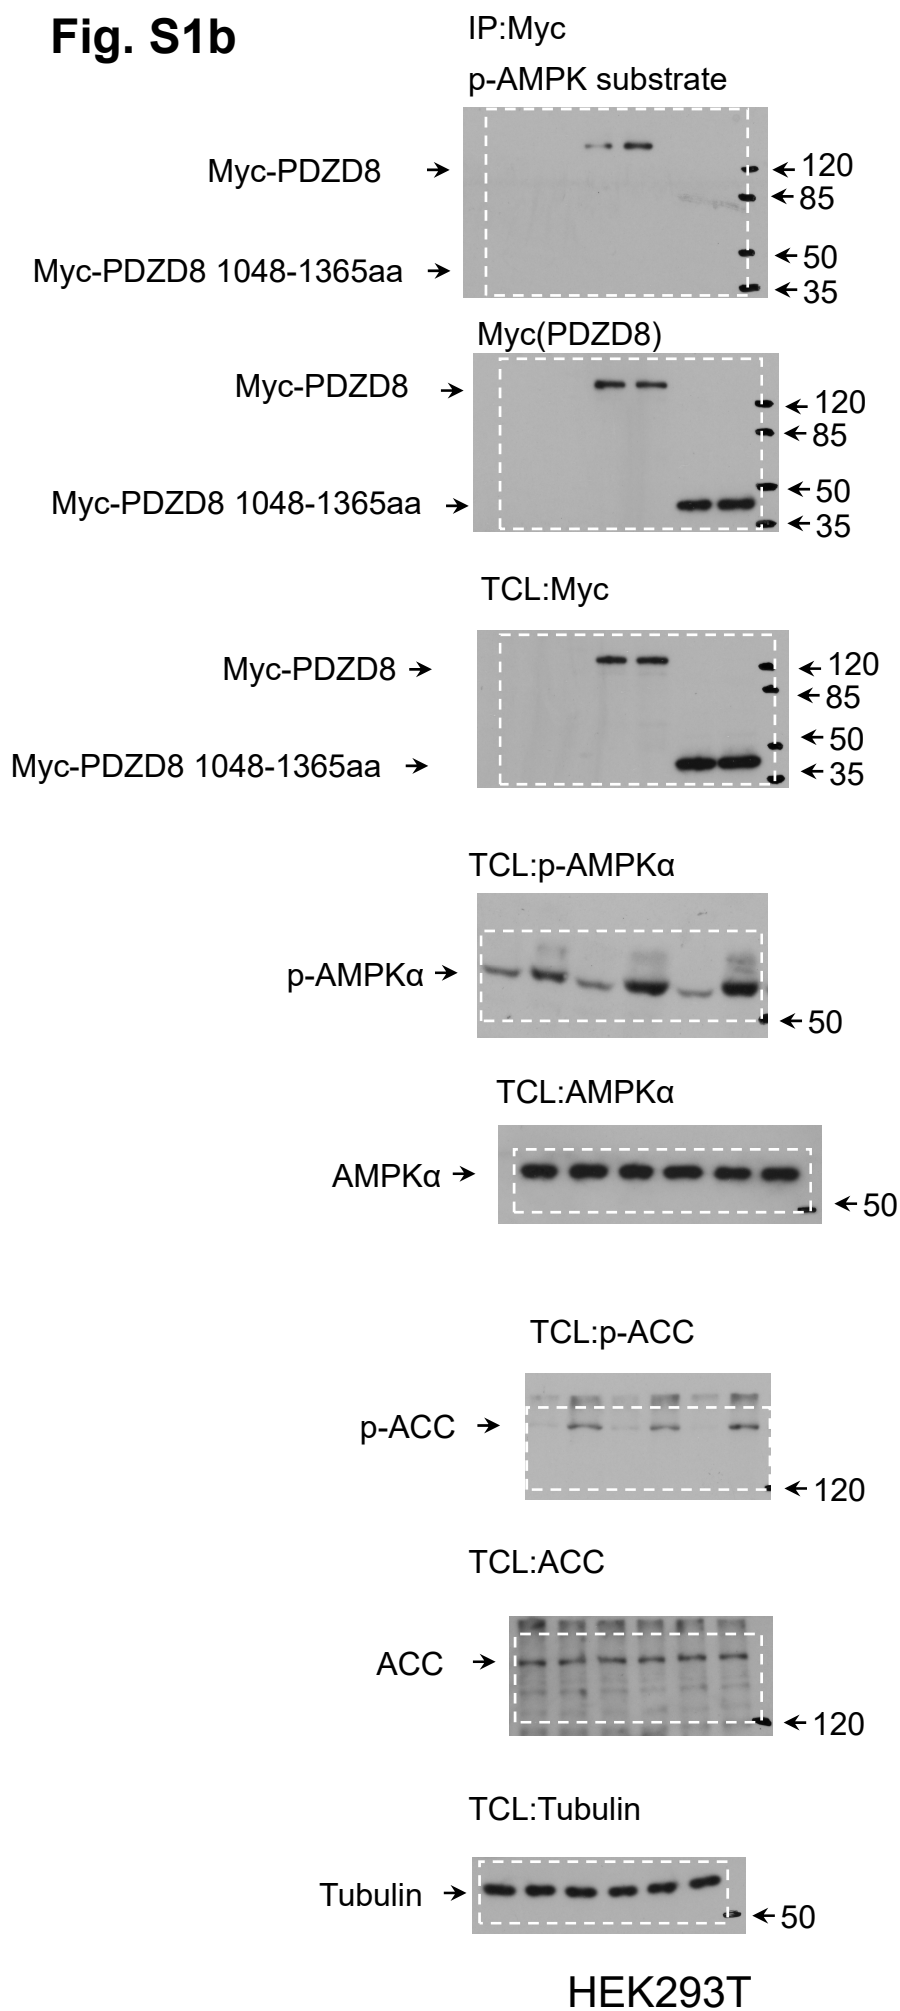

**Fig. S1b**

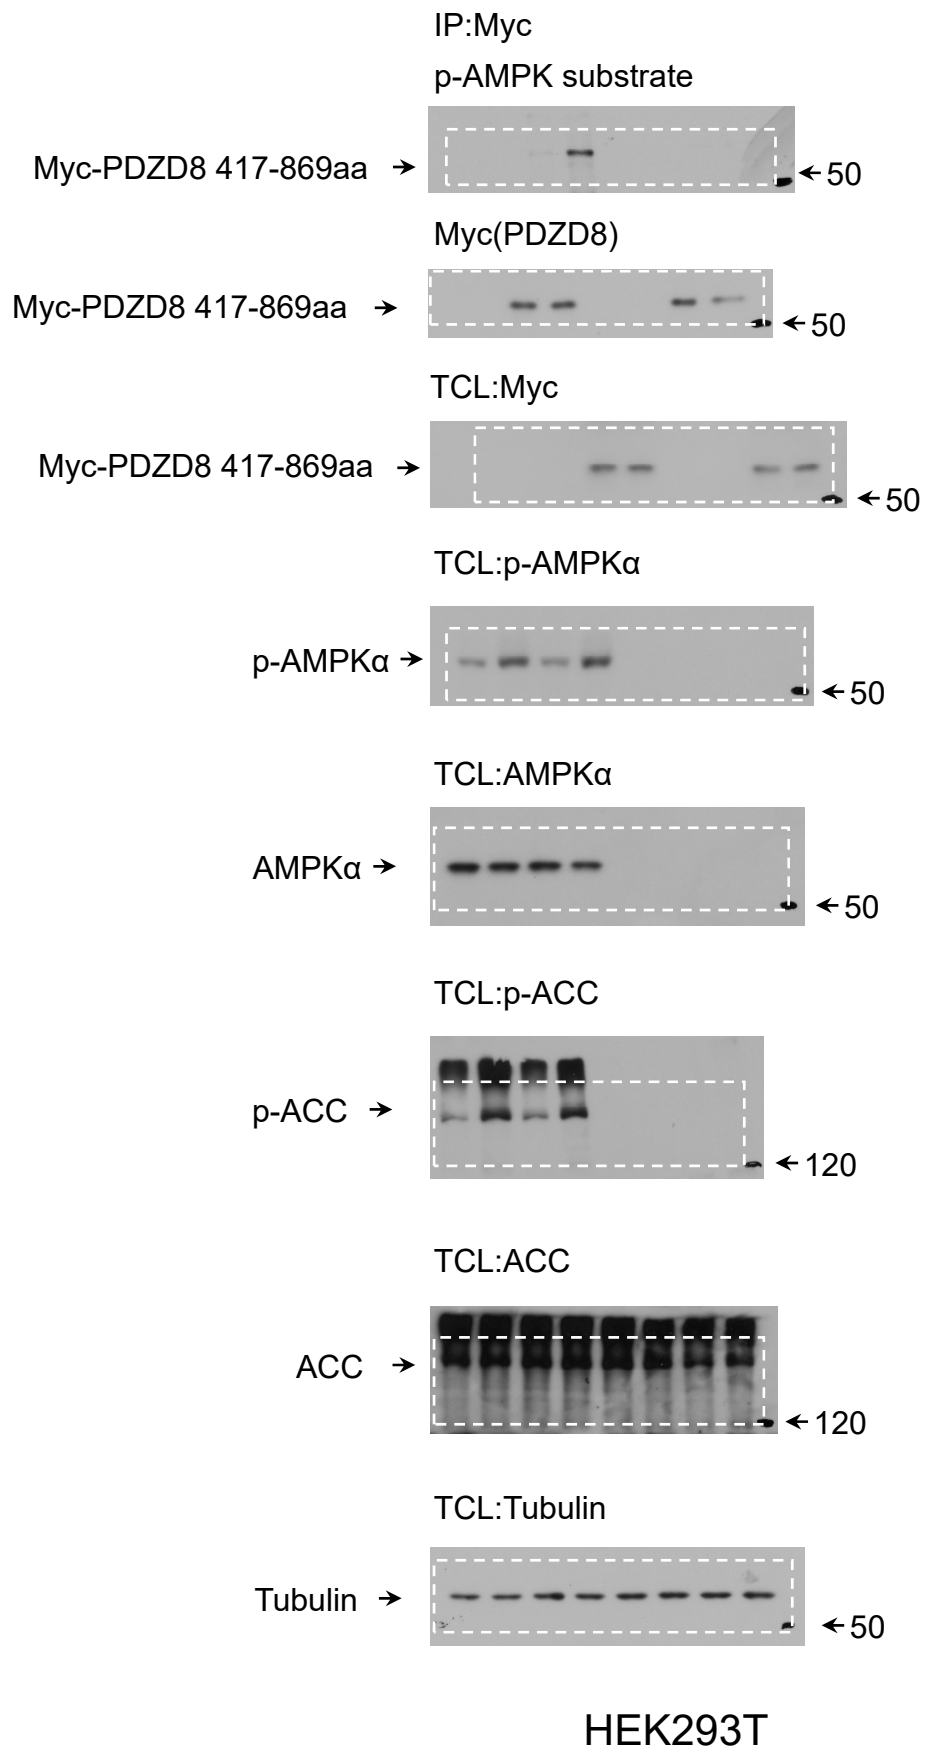

**Fig. S1c**

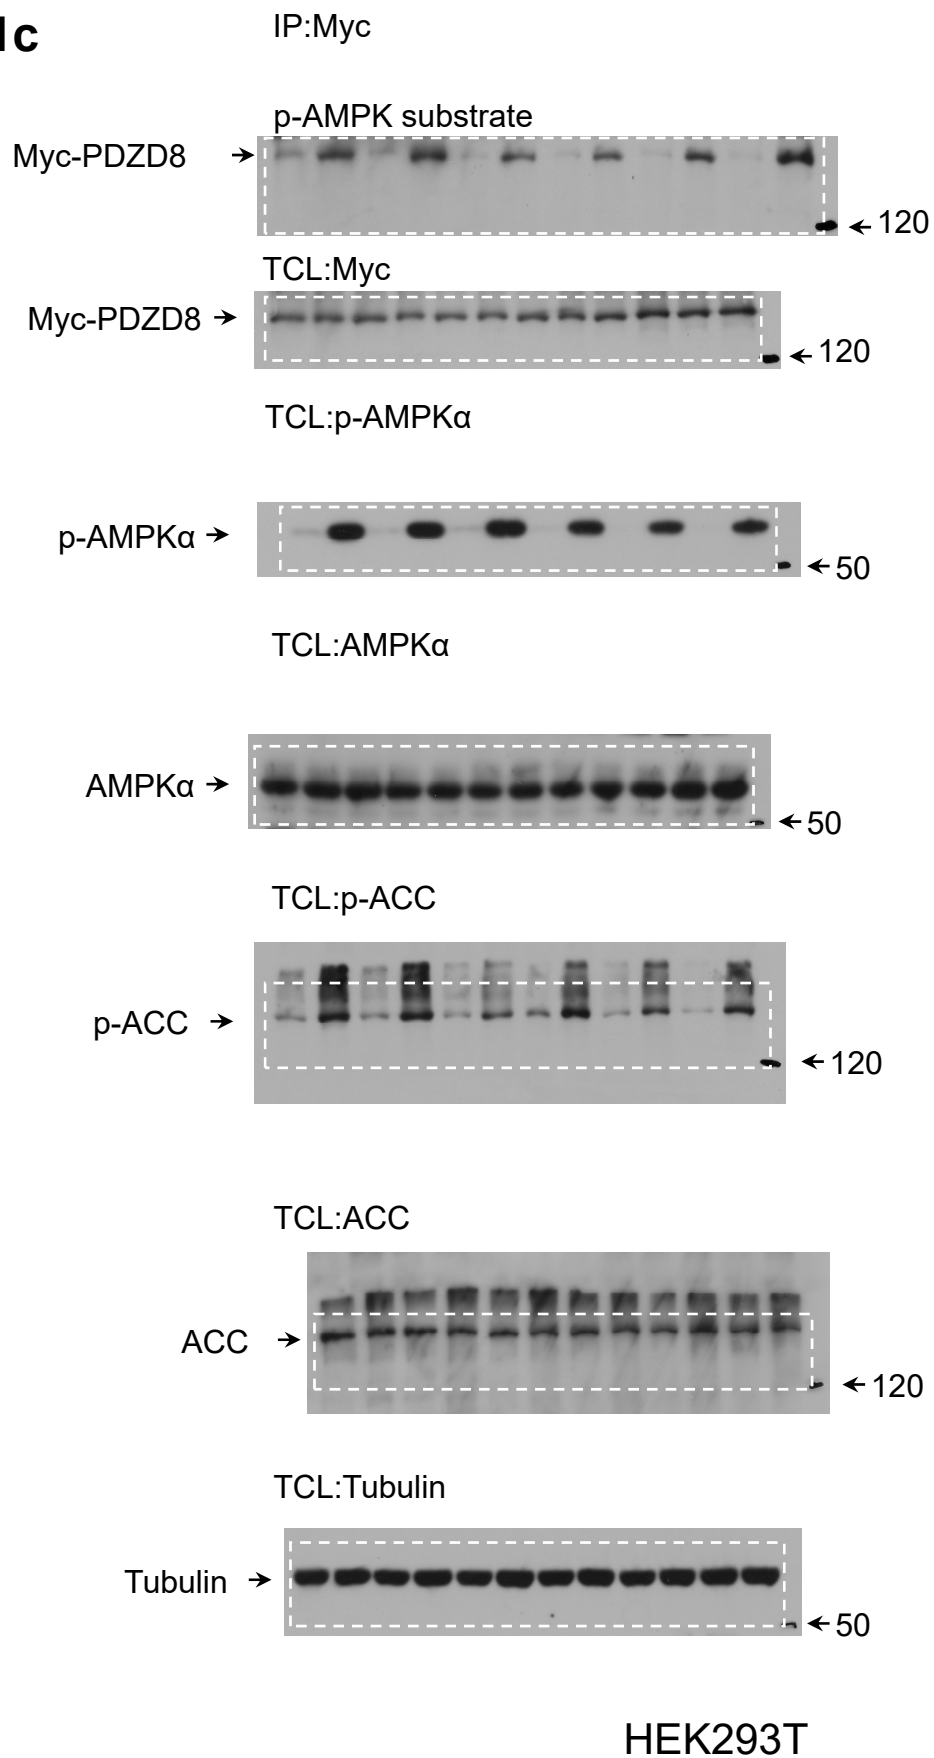

**Fig. S1c**

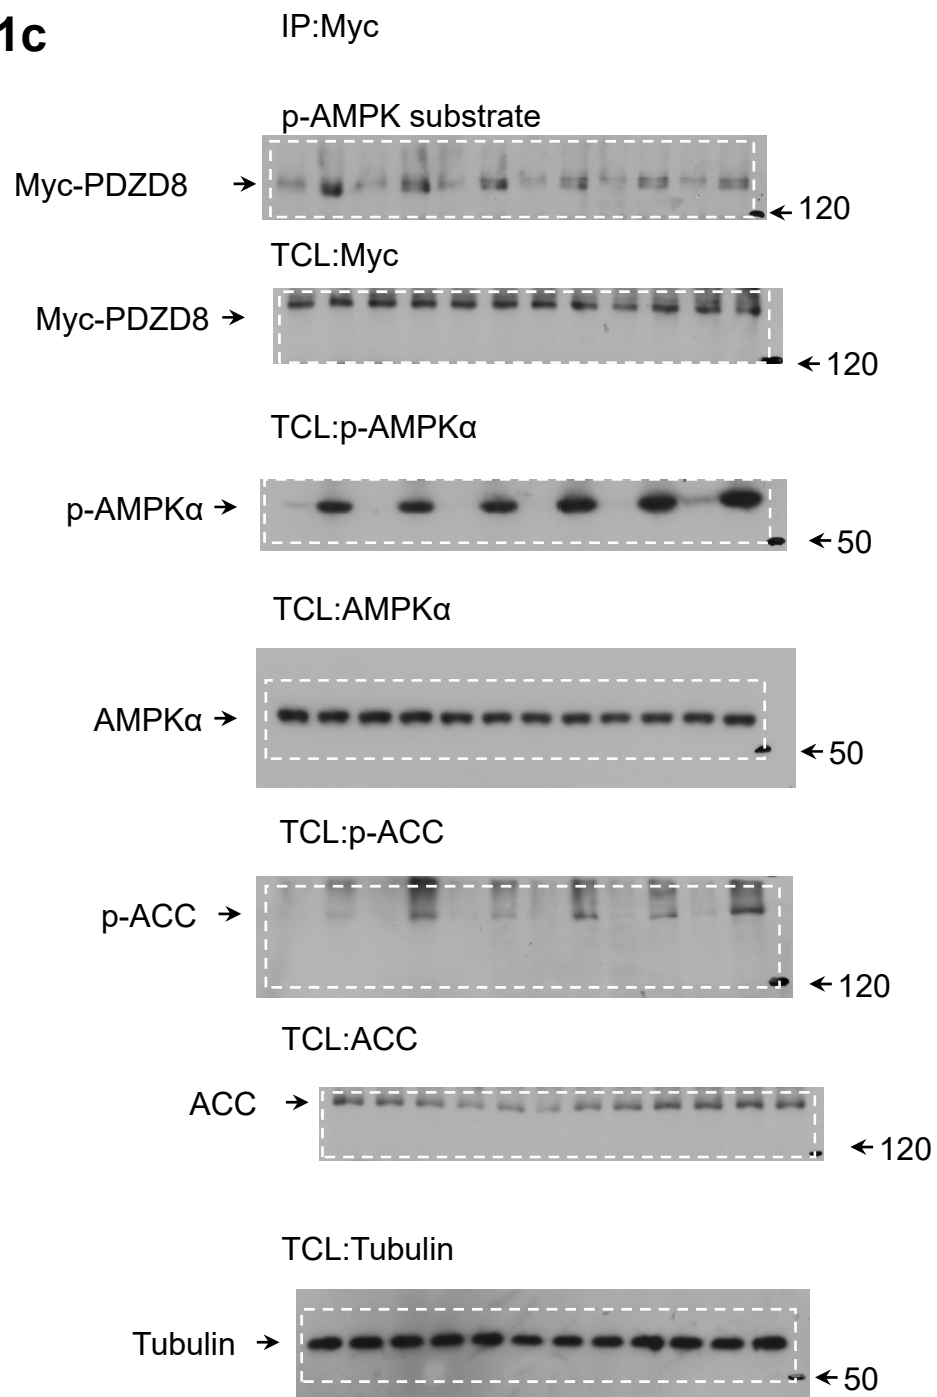

HEK293T

**Fig. S1c**

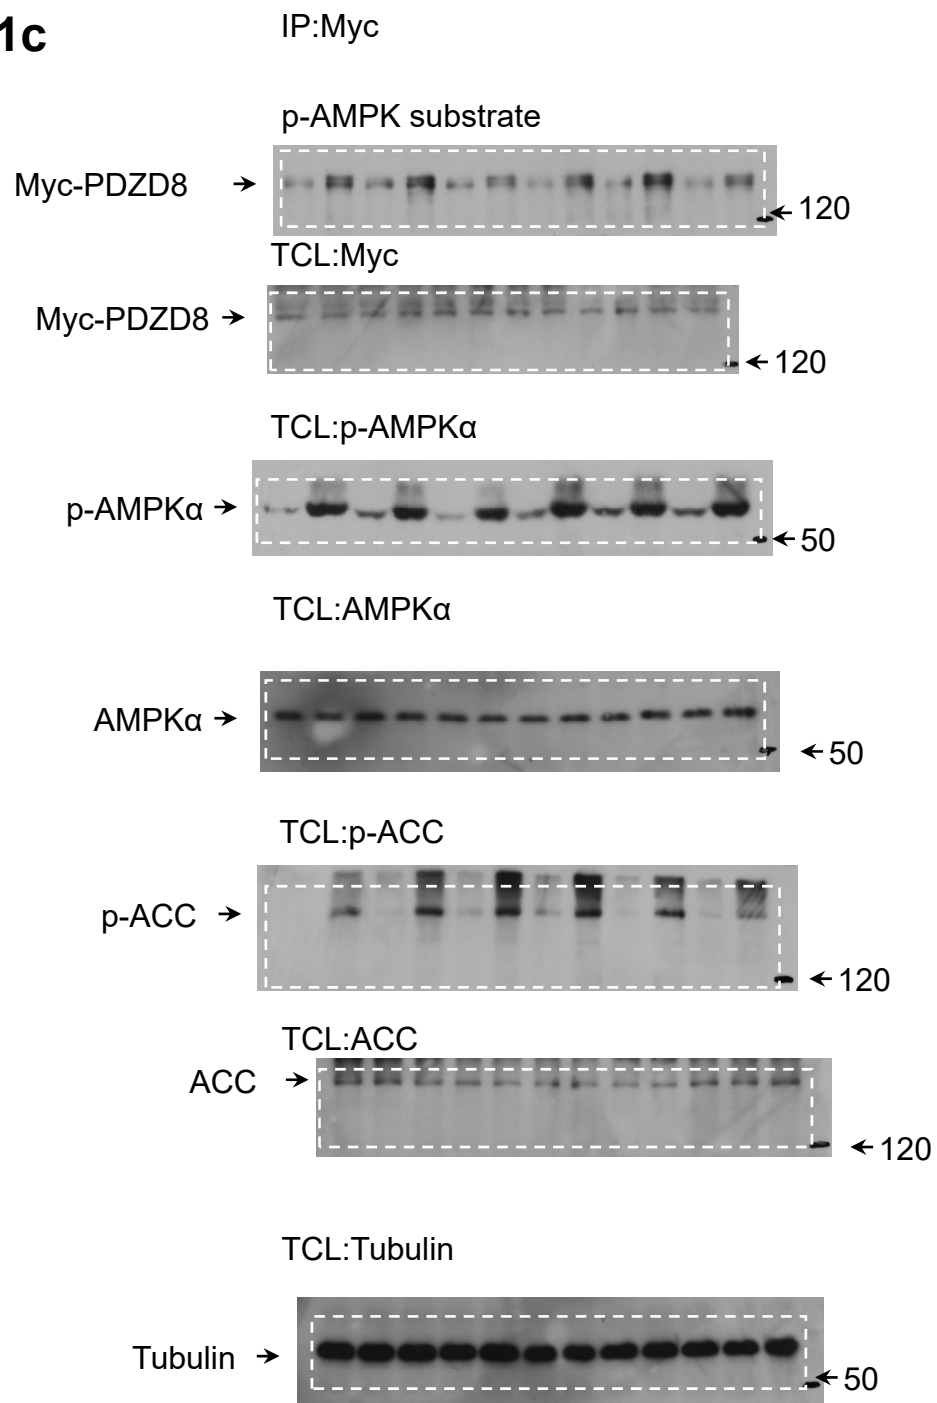

HEK293T

**Fig. S1c**

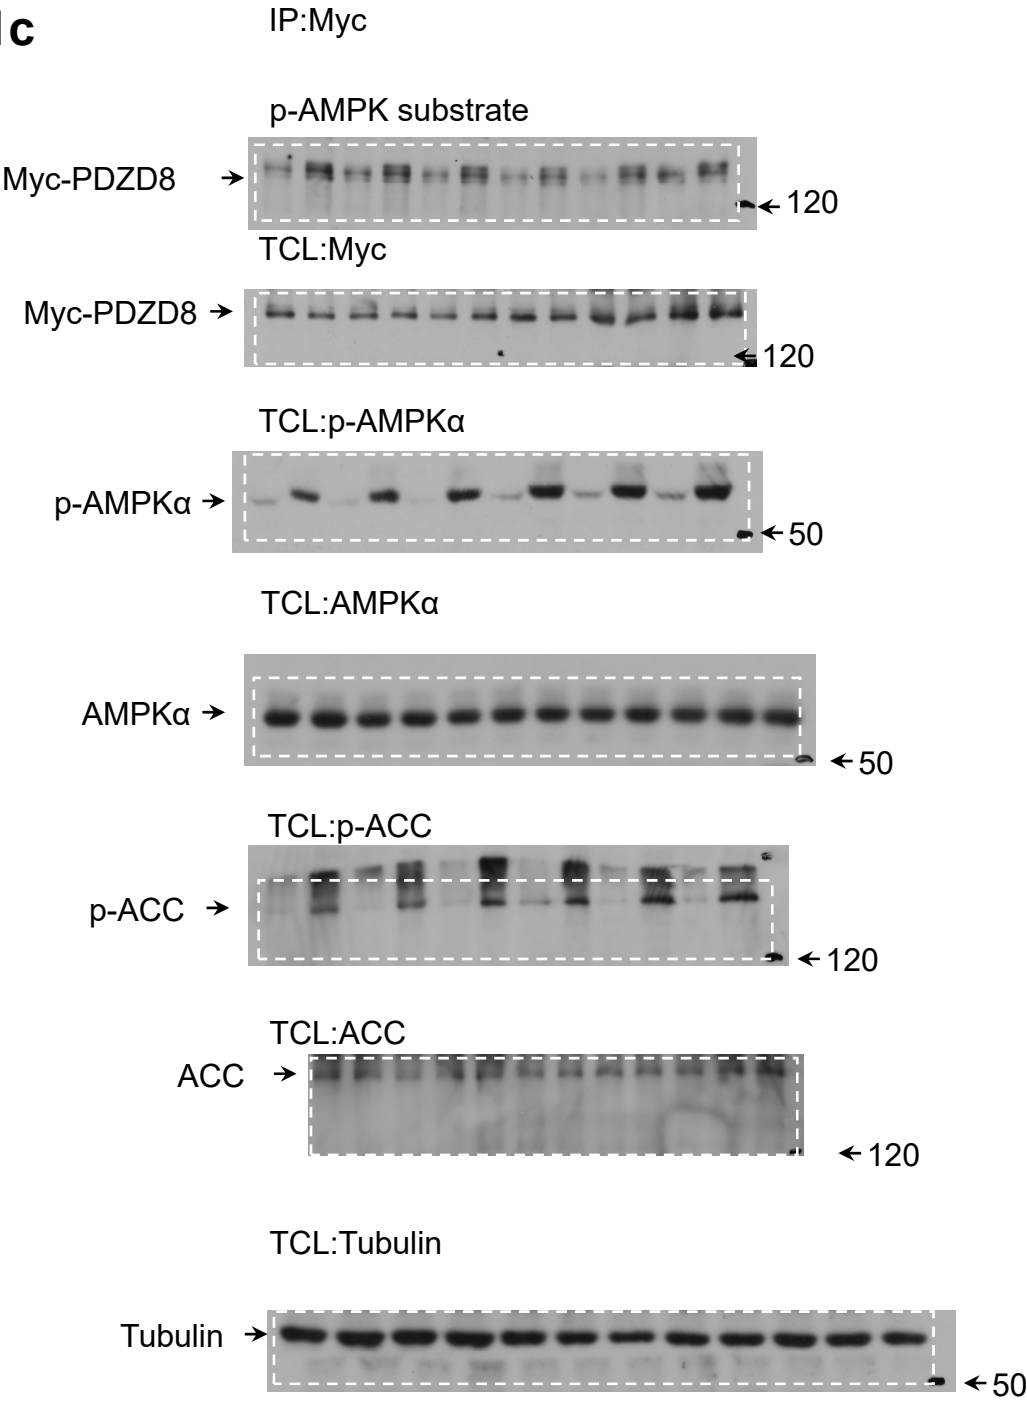

HEK293T

**Fig. S1c**

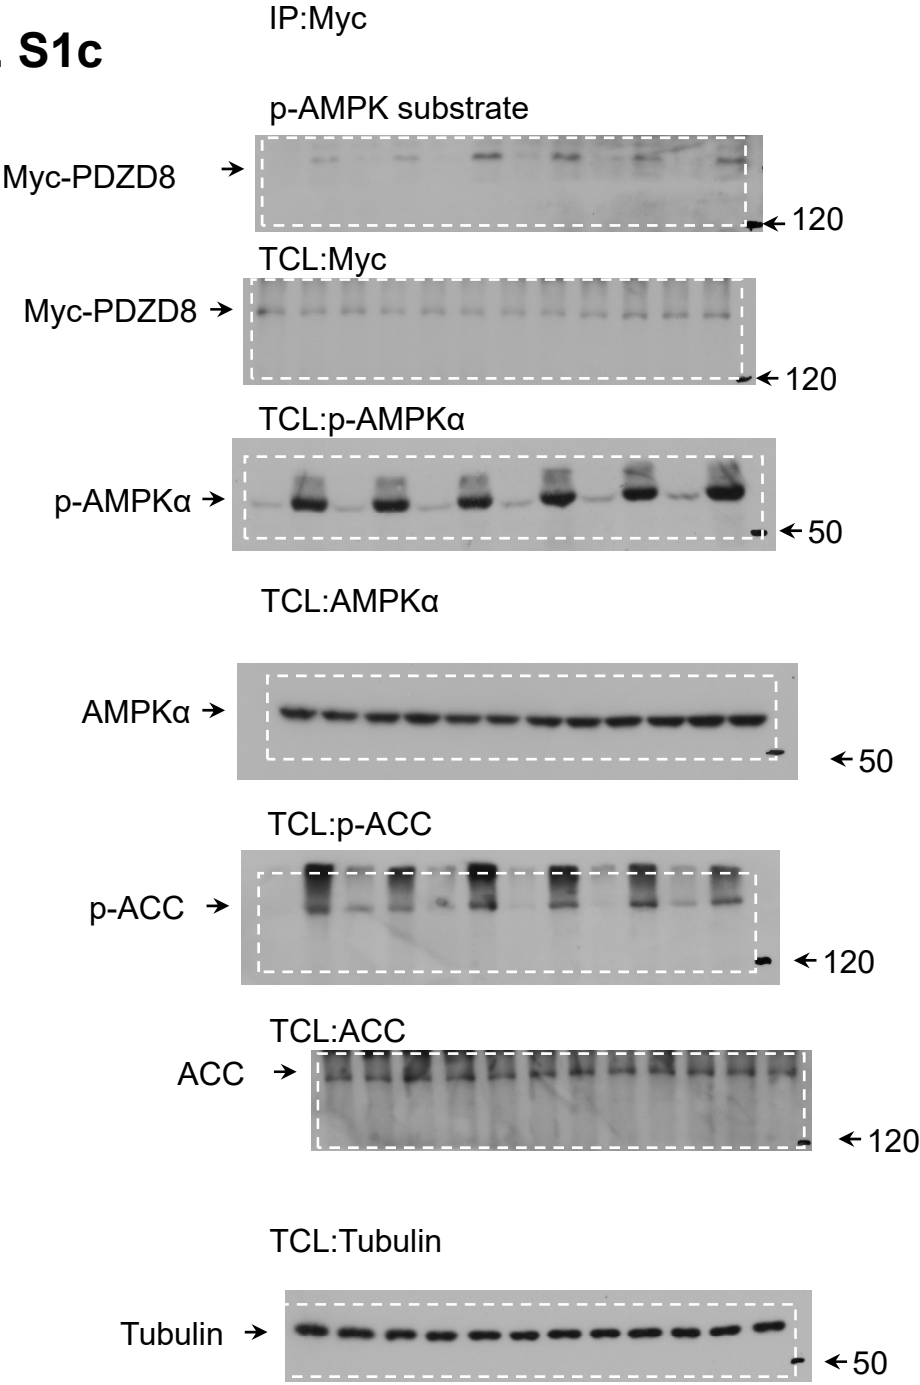

HEK293T

**Fig. S1c**

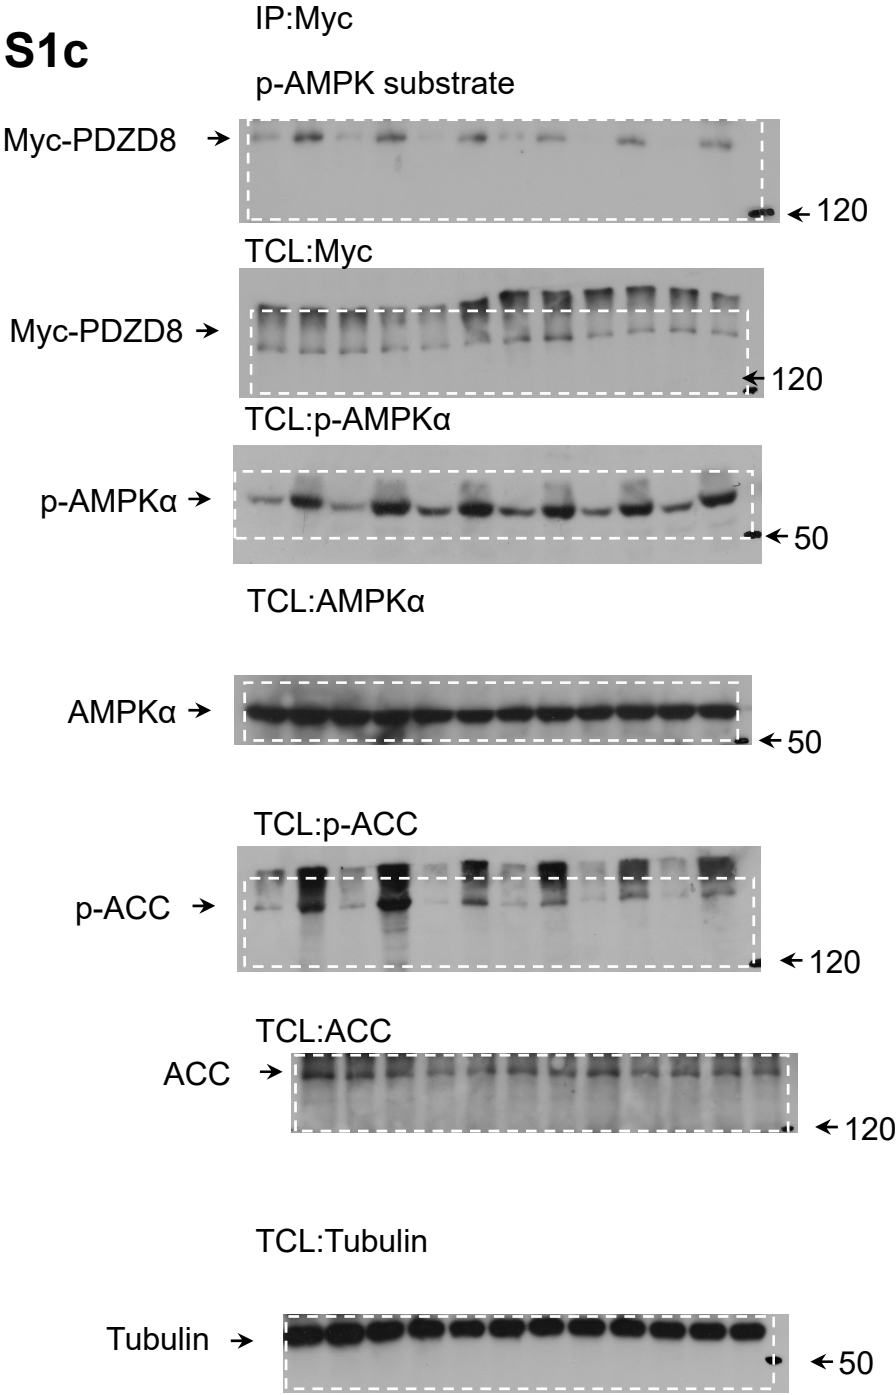

HEK293T

**Fig. S1c**

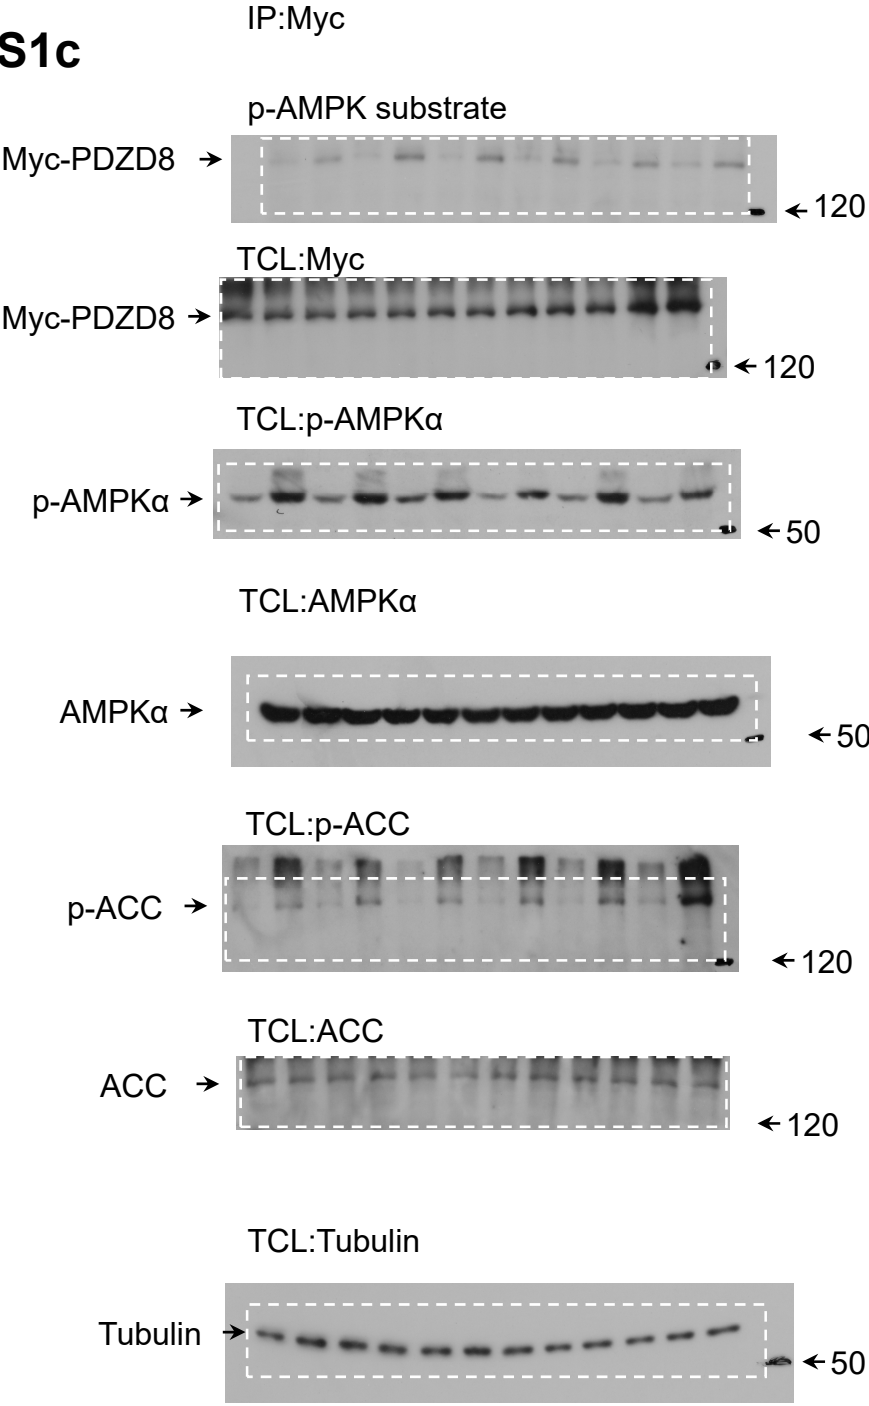

HEK293T

**Fig. S1c**

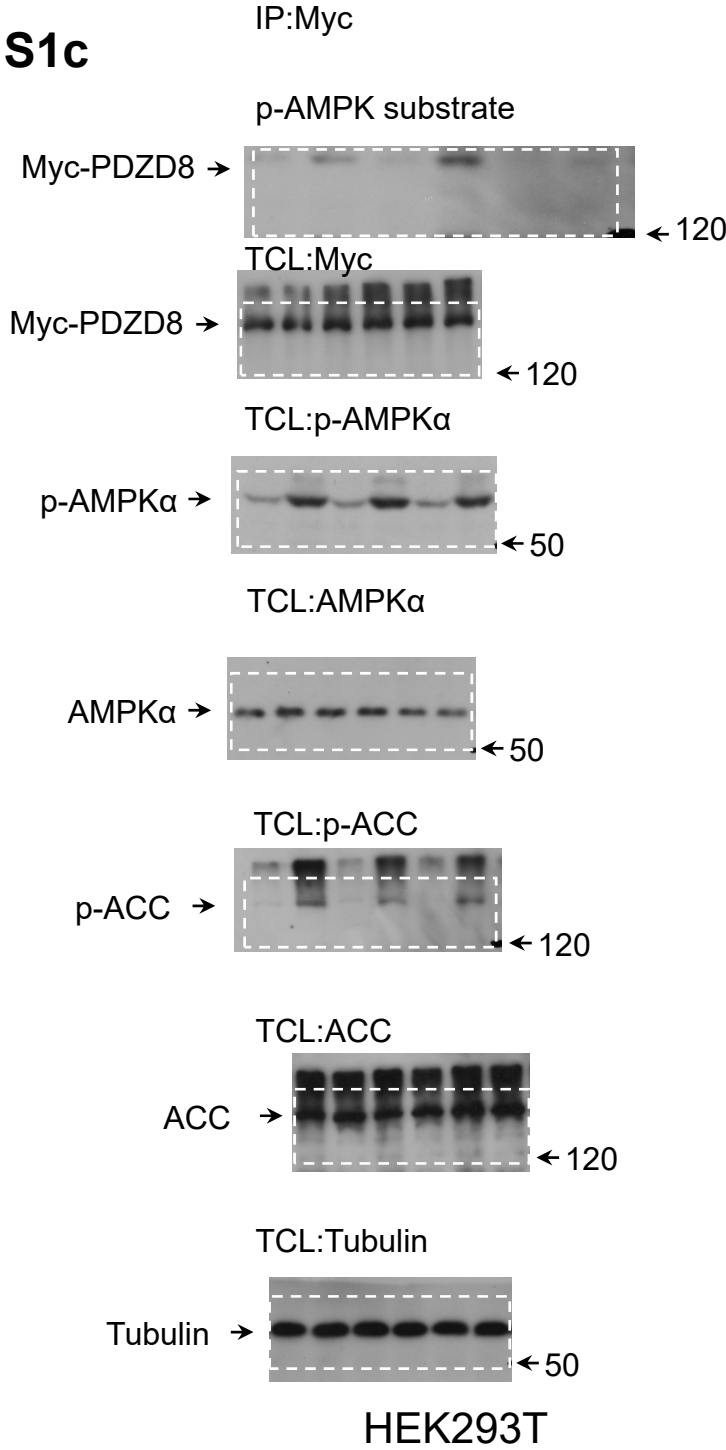

**Fig. S1c**

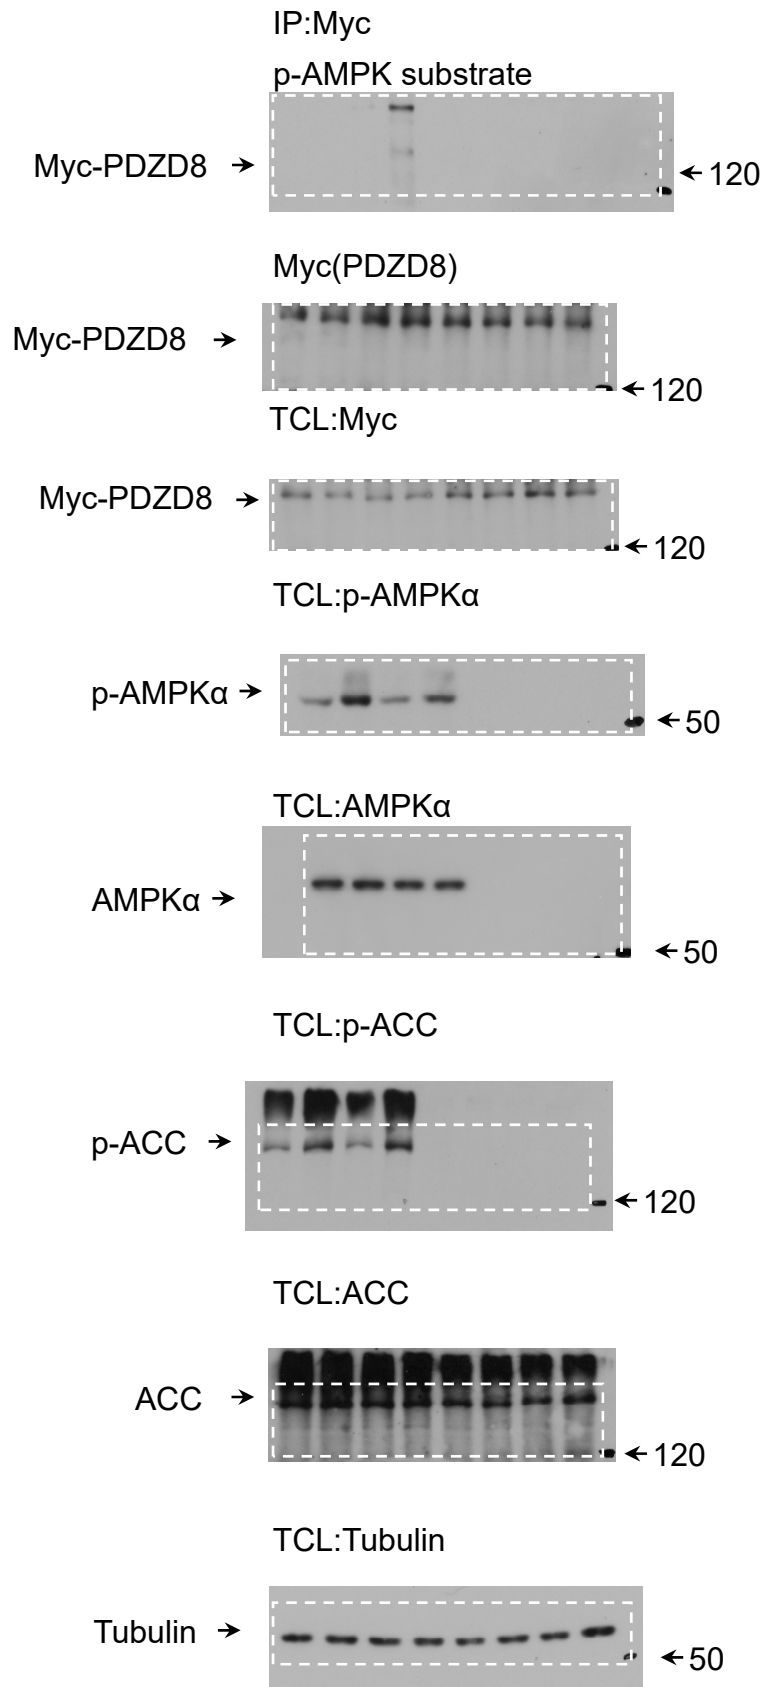

HEK293T

**Fig. S1d**

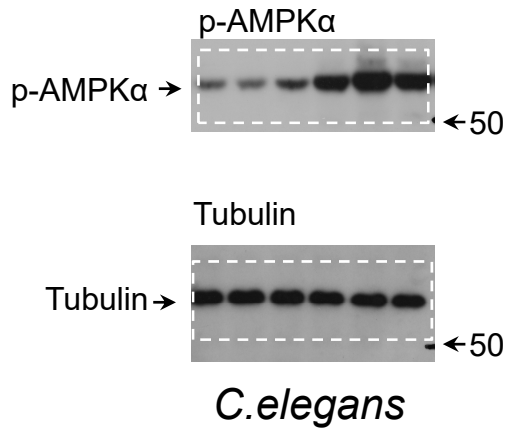

**Fig. S1g**

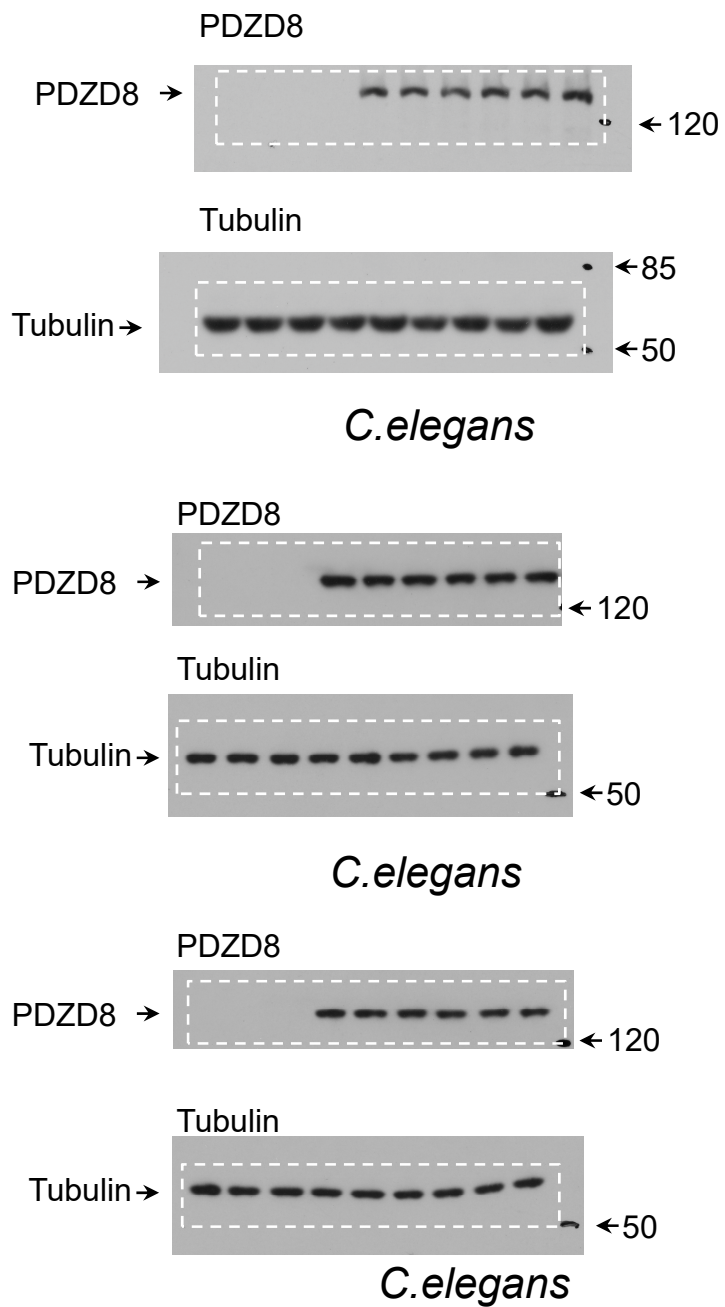

**Fig. S2b**

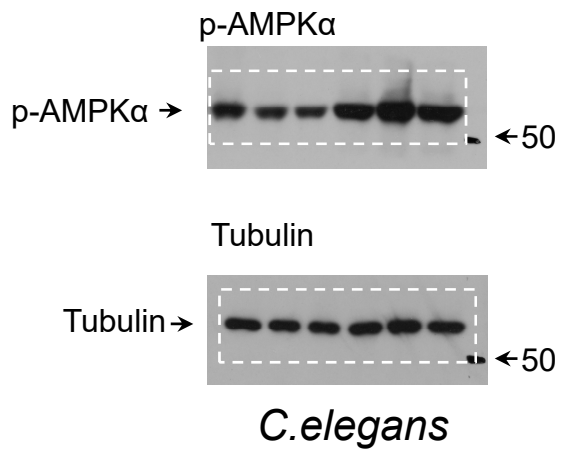

**Fig. S4a**

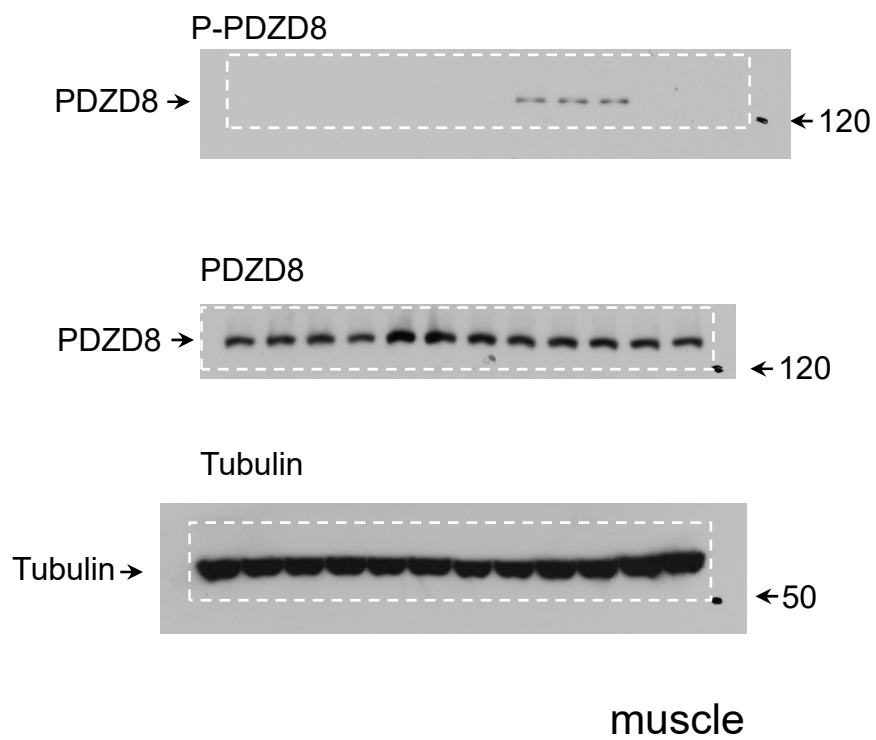

Supplement: Supplementary file 5 — Full scan [file 41422_2024_1021_MOESM5_ESM.pdf]
