# Supplementary material for: AMPK-PDZD8-GLS1 axis mediates calorie restriction-induced lifespan extension
Source: PubMed Central journal article supplement (PMC11528062; doi:10.1038/s41422-024-01021-3), 2024-09-19
Supplement: 41422_2024_1021_MOESM2_ESM.pdf [file 41422_2024_1021_MOESM2_ESM.pdf]

**Supplementary information, Table S1. Summary of lifespan analysis in worms<sup>a,b</sup>**

| Genotypes/<br>treatments                           | Mean life span (days)           |                         |                | Median life span (days)         |                         |             | N <sup>c</sup> | N <sup>d</sup> | N <sup>e</sup> | P-value Vs<br>saline control<br>within each<br>genotype<br>(Mantel-CoX) |
|----------------------------------------------------|---------------------------------|-------------------------|----------------|---------------------------------|-------------------------|-------------|----------------|----------------|----------------|-------------------------------------------------------------------------|
|                                                    | Estimated life<br>span ± s.e.m. | 95% confidence interval |                | Estimated life<br>span ± s.e.m. | 95% confidence interval |             |                |                |                |                                                                         |
|                                                    |                                 | Lower<br>bound          | Upper<br>bound |                                 | Lower bound             | Upper bound |                |                |                |                                                                         |
| <b>Fig. 1d</b>                                     |                                 |                         |                |                                 |                         |             |                |                |                |                                                                         |
| <i>Pdzd-8<sup>-/-</sup></i> + PDZD8-WT             | 18.194 ± 0.353                  | 17.503                  | 18.886         | 18.000 ± 0.430                  | 17.158                  | 18.842      | 185            | 15             | 200            | N/A                                                                     |
| <i>Pdzd-8<sup>-/-</sup></i> + PDZD8-WT + 2-DG      | 23.000 ± 0.477                  | 22.064                  | 23.935         | 24.000 ± 0.629                  | 22.768                  | 25.232      | 188            | 12             | 200            | <0.001                                                                  |
| <i>Pdzd-8<sup>-/-</sup></i> + PDZD8-T527A          | 16.997 ± 0.399                  | 16.215                  | 17.779         | 18.000 ± 0.991                  | 16.057                  | 19.943      | 187            | 13             | 200            | N/A                                                                     |
| <i>Pdzd-8<sup>-/-</sup></i> + PDZD8-T527A + 2-DG   | 15.568 ± 0.327                  | 14.926                  | 16.209         | 16.000 ± 0.490                  | 15.039                  | 16.961      | 184            | 16             | 200            | <0.001                                                                  |
| <b>Fig. 1e</b>                                     |                                 |                         |                |                                 |                         |             |                |                |                |                                                                         |
| CA-aak2; <i>Pdzd-8<sup>-/-</sup></i> + PDZD8-T527A | 19.293 ± 0.405                  | 18.498                  | 20.087         | 20.000 ± 0.585                  | 18.853                  | 21.147      | 180            | 20             | 200            | N/A                                                                     |
| CA-aak2; <i>Pdzd-8<sup>-/-</sup></i> + PDZD8-WT    | 25.293 ± 0.512                  | 24.289                  | 26.296         | 28.000 ± 0.504                  | 27.011                  | 28.989      | 180            | 20             | 200            | <0.001                                                                  |
| <b>Fig. 1f</b>                                     |                                 |                         |                |                                 |                         |             |                |                |                |                                                                         |
| N2                                                 | 19.946 ± 0.382                  | 19.197                  | 20.696         | 20.000 ± 0.532                  | 18.957                  | 21.043      | 193            | 7              | 200            | N/A                                                                     |
| N2 Ex PDZD8-T527E                                  | 24.592 ± 0.494                  | 23.624                  | 25.560         | 24.000 ± 0.708                  | 22.612                  | 25.388      | 193            | 7              | 200            | <0.001                                                                  |
| N2 Ex PDZD8-T527D                                  | 20.044 ± 0.389                  | 19.280                  | 20.807         | 20.000 ± 0.480                  | 19.059                  | 20.941      | 193            | 7              | 200            | 0.774                                                                   |
| <b>Fig. 1g (left)</b>                              |                                 |                         |                |                                 |                         |             |                |                |                |                                                                         |
| <i>Pdzd-8<sup>-/-</sup></i> + PDZD8-WT             | 19.603 ± 0.375                  | 18.868                  | 20.337         | 20.000 ± 0.448                  | 19.123                  | 20.877      | 194            | 6              | 200            | N/A                                                                     |
| <i>Pdzd-8<sup>-/-</sup></i> + PDZD8-WT + 2-DG      | 24.790 ± 0.483                  | 23.842                  | 25.737         | 25.000 ± 0.722                  | 22.585                  | 25.415      | 189            | 11             | 200            | <0.001                                                                  |
| <i>Pdzd-8<sup>-/-</sup></i> + PDZD8-T527D          | 20.083 ± 0.380                  | 19.337                  | 20.828         | 20.000 ± 0.462                  | 19.094                  | 20.906      | 193            | 7              | 200            | N/A                                                                     |
| <i>Pdzd-8<sup>-/-</sup></i> + PDZD8-T527D + 2-DG   | 19.852 ± 0.395                  | 19.078                  | 20.626         | 20.000 ± 0.544                  | 18.933                  | 21.067      | 192            | 8              | 200            | 0.679                                                                   |
| <b>Fig. 1g (right)</b>                             |                                 |                         |                |                                 |                         |             |                |                |                |                                                                         |
| <i>Pdzd-8<sup>-/-</sup></i> + PDZD8-WT             | 19.678 ± 0.380                  | 18.934                  | 20.422         | 20.000 ± 0.431                  | 19.156                  | 20.844      | 190            | 10             | 200            | N/A                                                                     |
| <i>Pdzd-8<sup>-/-</sup></i> + PDZD8-WT + 2-DG      | 24.399 ± 0.486                  | 23.447                  | 25.352         | 24.000 ± 0.490                  | 23.039                  | 24.961      | 191            | 9              | 200            | <0.001                                                                  |
| <i>Pdzd-8<sup>-/-</sup></i> + PDZD8-T527E          | 24.123 ± 0.498                  | 23.147                  | 25.100         | 24.000 ± 0.762                  | 22.507                  | 25.493      | 191            | 9              | 200            | N/A                                                                     |
| <i>Pdzd-8<sup>-/-</sup></i> + PDZD8-T527E + 2-DG   | 24.256 ± 0.489                  | 23.297                  | 25.215         | 24.000 ± 0.471                  | 23.076                  | 24.924      | 190            | 10             | 200            | 0.920                                                                   |
| <b>Fig. 1h</b>                                     |                                 |                         |                |                                 |                         |             |                |                |                |                                                                         |
| <i>Pdzd-8<sup>-/-</sup></i> + PDZD8-WT             | 18.763 ± 0.394                  | 17.991                  | 19.536         | 20.000 ± 0.735                  | 18.559                  | 21.411      | 186            | 14             | 200            | N/A                                                                     |
| <i>Pdzd-8<sup>-/-</sup></i> + PDZD8-WT + CR        | 25.067 ± 0.526                  | 24.036                  | 26.099         | 26.000 ± 0.548                  | 24.925                  | 27.075      | 184            | 16             | 200            | <0.001                                                                  |
| <i>Pdzd-8<sup>-/-</sup></i> + PDZD8-T527A          | 19.114 ± 0.391                  | 18.348                  | 19.880         | 20.000 ± 0.559                  | 18.904                  | 21.096      | 179            | 21             | 200            | N/A                                                                     |
| <i>Pdzd-8<sup>-/-</sup></i> + PDZD8-T527A + CR     | 16.428 ± 0.277                  | 15.885                  | 16.971         | 18.000 ± 0.362                  | 17.290                  | 18.710      | 184            | 16             | 200            | <0.001                                                                  |
| <b>Fig. 1j</b>                                     |                                 |                         |                |                                 |                         |             |                |                |                |                                                                         |
| glna-null + KGA-WT                                 | 18.816 ± 0.405                  | 18.023                  | 19.609         | 18.000 ± 0.684                  | 16.659                  | 19.341      | 177            | 23             | 200            | N/A                                                                     |
| glna-null + KGA-WT + 2-DG                          | 21.750 ± 0.434                  | 20.899                  | 22.600         | 22.000 ± 0.454                  | 21.111                  | 22.889      | 188            | 20             | 200            | <0.001                                                                  |
| glna-null + KGA-33A                                | 18.330 ± 0.395                  | 17.556                  | 19.104         | 18.000 ± 0.776                  | 16.480                  | 19.520      | 187            | 13             | 200            | N/A                                                                     |
| glna-null + KGA-33A + 2-DG                         | 18.502 ± 0.395                  | 17.728                  | 19.276         | 18.000 ± 0.795                  | 16.442                  | 19.558      | 186            | 14             | 200            | 0.487                                                                   |
| <b>Fig. 1i</b>                                     |                                 |                         |                |                                 |                         |             |                |                |                |                                                                         |
| N2                                                 | 18.030 ± 0.376                  | 17.294                  | 18.766         | 18.000 ± 0.482                  | 17.056                  | 18.944      | 184            | 16             | 200            | N/A                                                                     |
| N2 + 2-DG                                          | 21.282 ± 0.469                  | 20.363                  | 22.202         | 22.000 ± 0.605                  | 20.185                  | 23.185      | 187            | 13             | 200            | <0.001                                                                  |
| glna-null                                          | 17.710 ± 0.353                  | 17.018                  | 18.402         | 18.000 ± 0.447                  | 17.124                  | 18.876      | 189            | 11             | 200            | N/A                                                                     |
| glna-null + 2DG                                    | 18.084 ± 0.373                  | 17.354                  | 18.815         | 18.000 ± 0.482                  | 17.056                  | 18.944      | 188            | 12             | 200            | 0.920                                                                   |
| <b>Fig. 1k</b>                                     |                                 |                         |                |                                 |                         |             |                |                |                |                                                                         |
| N2                                                 | 18.215 ± 0.356                  | 17.517                  | 18.912         | 18.000 ± 0.440                  | 17.137                  | 18.863      | 187            | 13             | 200            | N/A                                                                     |
| N2 + CR                                            | 21.786 ± 0.437                  | 20.931                  | 22.642         | 22.000 ± 0.625                  | 20.774                  | 23.226      | 186            | 14             | 200            | <0.001                                                                  |
| glna-null                                          | 18.229 ± 0.365                  | 17.514                  | 18.943         | 18.000 ± 0.448                  | 17.121                  | 18.879      | 185            | 15             | 200            | N/A                                                                     |
| glna-null + CR                                     | 18.415 ± 0.377                  | 17.676                  | 19.154         | 18.000 ± 0.514                  | 16.993                  | 19.007      | 181            | 19             | 200            | 0.895                                                                   |
| <b>Fig. 1l</b>                                     |                                 |                         |                |                                 |                         |             |                |                |                |                                                                         |
| glna-null + KGA-WT                                 | 19.414 ± 0.406                  | 18.619                  | 20.210         | 20.000 ± 0.469                  | 19.081                  | 20.919      | 179            | 21             | 200            | N/A                                                                     |
| glna-null + KGA-WT + CR                            | 25.293 ± 0.5212                 | 24.289                  | 26.296         | 26.000 ± 0.462                  | 27.011                  | 26.905      | 178            | 22             | 200            | <0.001                                                                  |
| glna-null + KGA-33A                                | 18.971 ± 0.409                  | 18.169                  | 19.772         | 20.000 ± 0.525                  | 18.971                  | 21.029      | 182            | 18             | 200            | N/A                                                                     |
| glna-null + KGA-33A + CR                           | 19.140 ± 0.380                  | 18.396                  | 19.885         | 20.000 ± 0.521                  | 18.978                  | 21.022      | 179            | 21             | 200            | 0.404                                                                   |
| <b>Fig. 1q (left)</b>                              |                                 |                         |                |                                 |                         |             |                |                |                |                                                                         |
| N2 + CR                                            | 23.900 ± 0.537                  | 22.847                  | 24.953         | 24.000 ± 0.562                  | 22.898                  | 25.102      | 200            | 0              | 200            | N/A                                                                     |
| N2 + CR + NAC                                      | 19.866 ± 0.376                  | 19.129                  | 20.602         | 20.000 ± 0.347                  | 19.319                  | 20.681      | 193            | 7              | 200            | <0.001                                                                  |

Supplementary information, Table S1. Summary of lifespan analysis in worms (cont.)<sup>a,b</sup>

| Genotypes/<br>treatments                   | Mean life span (days)           |                         |                | Median life span (days)         |                         |             | N <sup>c</sup> | N <sup>d</sup> | N <sup>e</sup> | P-value Vs<br>saline control<br>within each<br>genotype<br>(Mantel-CoX) |
|--------------------------------------------|---------------------------------|-------------------------|----------------|---------------------------------|-------------------------|-------------|----------------|----------------|----------------|-------------------------------------------------------------------------|
|                                            | Estimated life<br>span ± s.e.m. | 95% confidence interval |                | Estimated life<br>span ± s.e.m. | 95% confidence interval |             |                |                |                |                                                                         |
|                                            |                                 | Lower<br>bound          | Upper<br>bound |                                 | Lower bound             | Upper bound |                |                |                |                                                                         |
| <b>Fig. 1q (right)</b>                     |                                 |                         |                |                                 |                         |             |                |                |                |                                                                         |
| N2                                         | 21.757 ± 0.372                  | 21.029                  | 22.485         | 22.000 ± 0.311                  | 21.390                  | 22.610      | 190            | 10             | 200            | N/A                                                                     |
| N2 + NAC                                   | 21.658 ± 0.402                  | 20.869                  | 22.446         | 22.000 ± 0.437                  | 21.143                  | 22.857      | 189            | 11             | 200            | N/A                                                                     |
| <b>Supplementary information, Fig. S2a</b> |                                 |                         |                |                                 |                         |             |                |                |                |                                                                         |
| N2                                         | 20.554 ± 0.374                  | 19.820                  | 21.288         | 20.000 ± 0.434                  | 19.149                  | 20.851      | 185            | 15             | 200            | N/A                                                                     |
| N2 + 2-DG                                  | 24.984 ± 0.465                  | 24.074                  | 25.895         | 24.000 ± 0.651                  | 22.724                  | 25.276      | 188            | 12             | 200            | <0.001                                                                  |
| <i>Pdzd-8</i>                              | 20.340 ± 0.368                  | 19.619                  | 21.061         | 20.000 ± 0.457                  | 19.104                  | 20.896      | 186            | 14             | 200            | N/A                                                                     |
| <i>Pdzd-8</i> <sup>-/-</sup> + 2-DG        | 20.318 ± 0.378                  | 19.578                  | 21.058         | 20.000 ± 0.494                  | 19.031                  | 20.969      | 180            | 20             | 200            | 0.894                                                                   |
| <b>Supplementary information, Fig. S2d</b> |                                 |                         |                |                                 |                         |             |                |                |                |                                                                         |
| N2                                         | 19.835 ± 0.367                  | 19.115                  | 20.554         | 20.000 ± 0.427                  | 19.162                  | 20.838      | 193            | 7              | 200            | N/A                                                                     |
| N2 + CR                                    | 26.010 ± 0.524                  | 24.983                  | 27.037         | 26.000 ± 0.748                  | 24.533                  | 27.467      | 194            | 6              | 200            | <0.001                                                                  |
| <i>Pdzd-8</i> <sup>-/-</sup>               | 19.653 ± 0.367                  | 18.935                  | 20.372         | 20.000 ± 0.475                  | 19.068                  | 20.932      | 196            | 4              | 200            | N/A                                                                     |
| <i>Pdzd-8</i> <sup>-/-</sup> + CR          | 19.803 ± 0.377                  | 19.065                  | 20.541         | 20.000 ± 0.569                  | 18.885                  | 21.115      | 193            | 7              | 200            | 0.720                                                                   |

<sup>a</sup>Independent repeats of each lifespan experiment were performed. Data from representative experiments are shown.

<sup>b</sup>Lifespan data sets within each panel of this table were done in parallel and statistical analyses was done within the data set.

<sup>c</sup>Number of worms scored (death events).

<sup>d</sup>Number of worms censored.

<sup>e</sup>Total number of worms.

Supplementary information, Table S1. Summary of healthspan analysis in worms<sup>a,b</sup>

| Genotypes/<br>treatments                         | Mean life span (hours)          |                         |             | Median life span (hours)        |                         |             | N <sup>c</sup> | N <sup>d</sup> | N <sup>e</sup> | P-value Vs<br>saline control<br>within each<br>genotype<br>(Mantel-CoX) |
|--------------------------------------------------|---------------------------------|-------------------------|-------------|---------------------------------|-------------------------|-------------|----------------|----------------|----------------|-------------------------------------------------------------------------|
|                                                  | Estimated life<br>span ± s.e.m. | 95% confidence interval |             | Estimated life<br>span ± s.e.m. | 95% confidence interval |             |                |                |                |                                                                         |
|                                                  |                                 | Lower bound             | Upper bound |                                 | Lower bound             | Upper bound |                |                |                |                                                                         |
| <b>Fig. 1o</b>                                   |                                 |                         |             |                                 |                         |             |                |                |                |                                                                         |
| <i>Pdzd-8<sup>-/-</sup></i> + PDZD8-WT           | 10.231 ± 0.558                  | 9.138                   | 11.324      | 11.000 ± 0.929                  | 9.179                   | 12.821      | 51             | 9              | 60             | N/A                                                                     |
| <i>Pdzd-8<sup>-/-</sup></i> + PDZD8-WT + CR      | 14.878 ± 0.663                  | 13.578                  | 16.177      | 16.000 ± 0.779                  | 14.474                  | 17.526      | 47             | 13             | 60             | <0.001                                                                  |
| <i>Pdzd-8<sup>-/-</sup></i> + PDZD8-T527A        | 10.268 ± 0.493                  | 9.302                   | 11.234      | 11.000 ± 0.782                  | 9.467                   | 12.533      | 54             | 6              | 60             | N/A                                                                     |
| <i>Pdzd-8<sup>-/-</sup></i> + PDZD8-T527A + CR   | 10.947 ± 0.487                  | 9.992                   | 11.901      | 12.000 ± 0.551                  | 10.920                  | 13.080      | 47             | 13             | 60             | 0.829                                                                   |
| <b>Fig. 1p</b>                                   |                                 |                         |             |                                 |                         |             |                |                |                |                                                                         |
| glna-null + KGA-WT                               | 10.485 ± 0.513                  | 9.480                   | 11.490      | 11.000 ± 0.924                  | 9.189                   | 12.811      | 47             | 13             | 60             | N/A                                                                     |
| glna-null + KGA-WT + CR                          | 14.233 ± 0.722                  | 12.818                  | 15.647      | 15.000 ± 0.867                  | 13.301                  | 16.699      | 49             | 11             | 60             | <0.001                                                                  |
| glna-null + KGA-33A                              | 10.804 ± 0.429                  | 9.964                   | 11.644      | 11.000 ± 0.575                  | 9.874                   | 12.126      | 48             | 12             | 60             | N/A                                                                     |
| glna-null + KGA-33A + CR                         | 10.631 ± 0.491                  | 9.668                   | 11.595      | 11.000 ± 0.564                  | 9.894                   | 12.106      | 48             | 12             | 60             | 0.969                                                                   |
| <b>Supplementary information, Fig. S2g</b>       |                                 |                         |             |                                 |                         |             |                |                |                |                                                                         |
| <i>Pdzd-8<sup>-/-</sup></i> + PDZD8-WT           | 9.584 ± 0.561                   | 8.485                   | 10.683      | 10.000 ± 0.859                  | 8.316                   | 11.684      | 49             | 11             | 60             | N/A                                                                     |
| <i>Pdzd-8<sup>-/-</sup></i> + PDZD8-WT + 2-DG    | 13.767 ± 0.762                  | 12.274                  | 15.260      | 15.000 ± 0.758                  | 13.514                  | 16.486      | 50             | 10             | 60             | <0.001                                                                  |
| <i>Pdzd-8<sup>-/-</sup></i> + PDZD8-T527A        | 10.565 ± 0.464                  | 9.654                   | 11.475      | 11.000 ± 0.627                  | 9.771                   | 12.229      | 49             | 11             | 60             | N/A                                                                     |
| <i>Pdzd-8<sup>-/-</sup></i> + PDZD8-T527A + 2-DG | 10.407 ± 0.523                  | 9.381                   | 11.432      | 11.000 ± 0.732                  | 9.565                   | 12.435      | 48             | 12             | 60             | 0.430                                                                   |
| <b>Supplementary information, Fig. S2h</b>       |                                 |                         |             |                                 |                         |             |                |                |                |                                                                         |
| glna-null + KGA-WT                               | 10.532 ± 0.510                  | 9.533                   | 11.531      | 11.000 ± 0.972                  | 9.095                   | 12.905      | 48             | 12             | 60             | N/A                                                                     |
| glna-null + KGA-WT + 2-DG                        | 10.867 ± 0.460                  | 13.356                  | 16.067      | 16.000 ± 0.842                  | 20.774                  | 17.651      | 47             | 13             | 60             | <0.001                                                                  |
| glna-null + KGA-33A                              | 11.494 ± 0.453                  | 10.605                  | 12.383      | 12.000 ± 0.551                  | 10.919                  | 13.081      | 45             | 15             | 60             | N/A                                                                     |
| glna-null + KGA-33A + 2-DG                       | 10.867 ± 0.460                  | 9.965                   | 11.770      | 11.000 ± 0.518                  | 9.984                   | 12.016      | 45             | 15             | 60             | 0.024                                                                   |

<sup>a</sup>Independent repeats of each health span experiment were performed. Data from representative experiments are shown.

<sup>b</sup>Health span data sets within each panel of this table were done in parallel and statistical analyses was done within the data set.

<sup>c</sup>Number of worms scored (death events).

<sup>d</sup>Number of worms censored.

<sup>e</sup>Total number of worms.
